# Supplementary material for: Intracellular delivery of oncolytic viruses with engineered Salmonella causes viral replication and cell death
Source: PubMed Central journal article supplement — iScience. 2024 Apr 25;27(6):109813. doi: 10.1016/j.isci.2024.109813 (PMC11126981; doi:10.1016/j.isci.2024.109813), 2024-04-25
Supplement: mmc1.pdf [file mmc1.pdf]

iScience, Volume 27

## **Supplemental information**

### **Intracellular delivery of oncolytic viruses with engineered Salmonella causes viral replication and cell death**

**Shradha Khanduja, Shoshana M.K. Bloom, Vishnu Raman, Chinmay P.  
Deshpande, Christopher L. Hall, and Neil S. Forbes**

## Supplemental Materials

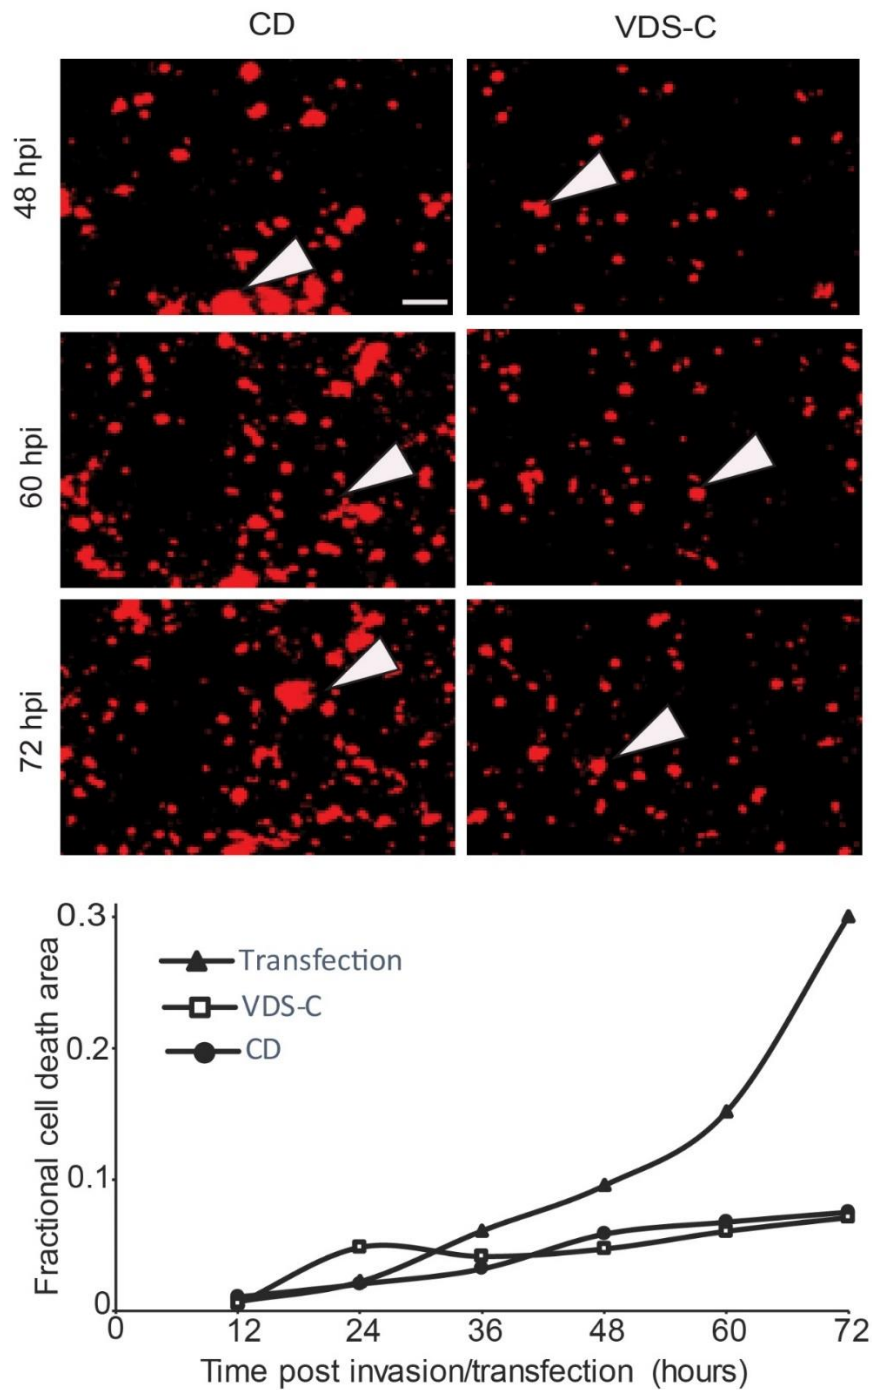

**Supplementary Figure 1: VDS-C did not cause cell death, related to Figure 6.** The cancer cell death for VDS-C did not increase over time as was comparable to the cell death by the bacterial control. In comparison, cells death increased in cells transfected with the MVMp plasmid. Scale bar is 50  $\mu$ m.

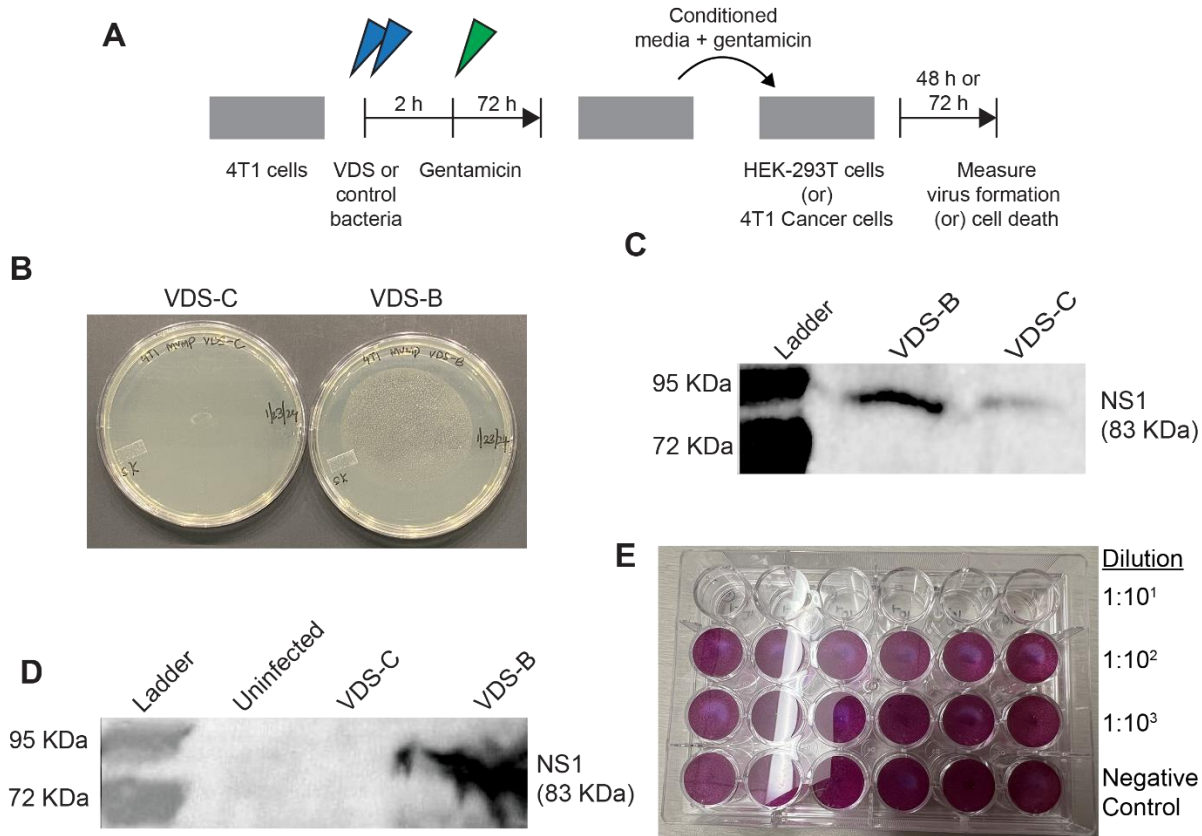

**Supplementary Figure 2: Virus re-infection and induced cell death, related to Figure 7.**

Three experiments were performed to measure the infectivity of the virus particles produced after delivery by VDS. These experiments are replicates of the experiments in Figure 7B&C using alternative techniques. **A**) Each of the experiments used a similar procedure to generate viruses. Cancer cells (4T1) were co-cultured with VDS-B or VDS-C (*blue arrows*) for two hours to allow for cell invasion. Extracellular bacteria were cleared by addition (*green arrow*) of gentamicin (50  $\mu\text{g}/\text{ml}$ ). During the following 72 hours, the intracellular bacteria lysed, the virus plasmid was delivered, and virus particles were produced by infected cells. After this period, the culture media were collected and added to fresh media. Gentamycin (50  $\mu\text{g}/\text{mL}$ ) was added to prevent bacterial growth. **B**) One milliliter of conditioned media was plated on agar plates. None of the media from either bacterial strain (VDS-B or VDS-C) contained viable bacteria. **C**) After the conditioned medium from cells treated with VDS-B was diluted 40:60 with fresh media and added to HEK-293T cultures, the cells formed NS1 from MVM. Conditioned media from cells treated with VDS-C formed less NS1. **D**) In a replicate experiment, conditioned media from uninfected cells, cells administered VDS-B or VDS-C were diluted 40:60 with fresh media and applied to HEK-293T cultures. The cells that received media from VDS-B cultures produced NS1, which matches the results in Figure 7B. **E**) To measure the induction of cell death by produced virus, the conditioned media was diluted at three decreasing dilutions (1:10<sup>1</sup>, 1:10<sup>2</sup> and 1:10<sup>3</sup>) and applied to 4T1 cells. After 72 hours, the media was removed and the cells were stained with crystal violet. The produced viral particles killed all cells (*empty, clear wells*) that received ten-fold (1:10) diluted medium. Control cells and higher dilutions remained viable (*violet*). This result matches the experiment in Figure 7C.

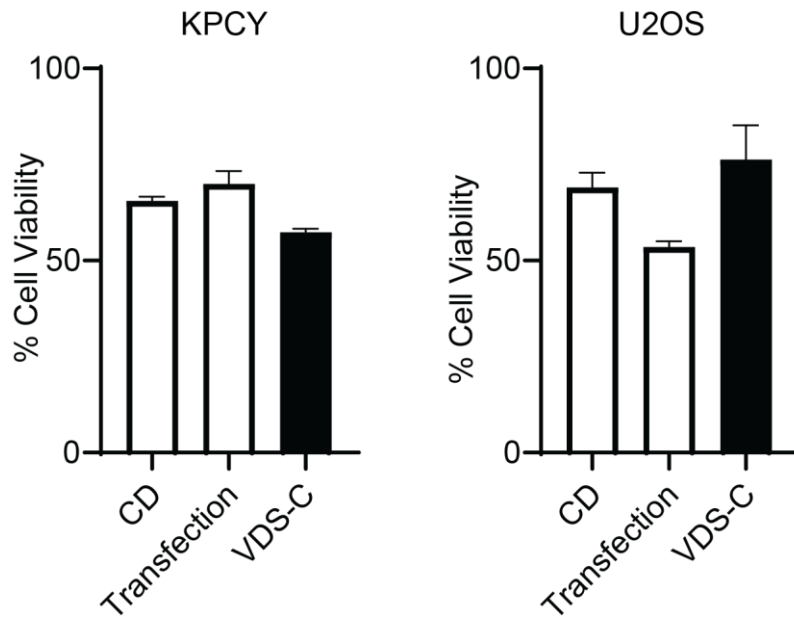

**Supplementary Figure 3: VDS-C did not induce cell death in either KPCY cell or U2OS cells, related to Figure 8.** There was no significant difference in the cell viability of the cells infected by VDS-C compared to bacterial controls (strain CD) in KPCY cells or U2OS cells.

**Supplemental Table S1. Primers for gene knockouts, related to Star methods.**

| Name   | Primer Sequence                                                               | Template | Gene             |
|--------|-------------------------------------------------------------------------------|----------|------------------|
| SK 033 | GTGACAGTTAAAAACGACAGCATAACAGAGCACATTCC<br>TCTTCCACGATTAgctcttgagcgattgtgtaggc | Pkd4     | SbcB<br>Forward  |
| SK 034 | TTACACAATCTCGGTTGCGTACTGCCACAGTGATTTC<br>GCAACCCAGCTaattagccatgtccatataaatc   | Pkd4     | SbcB<br>Reverse  |
| SK 047 | ATGCGCATCCTCCACACCTCTGACTGGCATCTGGGACA<br>AAATTTCTACAGgtcttgagcgattgtgtaggc   | Pkd4     | SbcCD<br>Forward |
| SK 048 | TTACTCCACGGCAAACGCTTTGTCCAGTTTGCTATAAC<br>CAAGCCATTGAaattagccatgtccatataaatc  | Pkd4     | SbcCD<br>Reverse |
| SK 029 | ATGTCACTGACGCGCCTTTTAATCAAAGACTTCCGCAA<br>CATAGAAAATGCgtcttgagcgattgtgtaggc   | Pkd4     | RecF<br>Forward  |
| SK 030 | TTAATCCGTTATTTTACCCTTTTCCACGGTAAACATCTT<br>CGAATTTTCATaattagccatgtccatataaatc | Pkd4     | RecF<br>Reverse  |
| SK 031 | GTCGCCGAGACTCTTGATCCTCTGCGCTTGCCCCTGAC<br>AGGCGAGCGTTTgtcttgagcgattgtgtaggc   | Pkd4     | RecB<br>Forward  |
| SK 032 | CGCTCCTCACTCATTTCACCTGCAAACATATCATCCA<br>GTTGGTTAATTaattagccatgtccatataaatc   | Pkd4     | RecB<br>Reverse  |
| SK 043 | GTGAAACAACAGAGACAACCTTCGTCGGCGCGAGGCTG<br>ATGAGACGGCGGAgctcttgagcgattgtgtaggc | Pkd4     | RecJ<br>Forward  |
| SK 044 | TCATAGCGGCCAAATATCATCGATAATAATCTGTAAA<br>CTACGGTTGCCGCaattagccatgtccatataaatc | Pkd4     | RecJ<br>Reverse  |
| SK 039 | ATGGCTATCGACGAAAACAAACAGAAAGCGTTGGCGG<br>CAGCACTGGGCCAgctcttgagcgattgtgtaggc  | Pkd4     | RecA<br>Forward  |
| SK 040 | TTAAAAATCTTCGTTGGTTTCTGCAACGCCTTCGCTAT<br>CGTCAACGGCGAaattagccatgtccatataaatc | Pkd4     | RecA<br>Reverse  |
